# Supplementary material for: Immobilization of molecular catalysts on electrode surfaces using host–guest interactions
Source: Springer Nature journal article supplement (doi:10.1038/s41557-021-00652-y), 2021-03-25
Supplement: 41557_2021_652_MOESM7_ESM.mol [file 41557_2021_652_MOESM7_ESM.mol]

nchem.20040902B-comp3.mol
  ChemDraw01282123102D

 49 57  0  0  0  0  0  0  0  0999 V2000
   -6.1804   -0.1014    0.0000 C   0  0  0  0  0  0  0  0  0  0  0  0
   -5.8113   -0.8393    0.0000 C   0  0  0  0  0  0  0  0  0  0  0  0
   -4.9878   -0.8886    0.0000 C   0  0  0  0  0  0  0  0  0  0  0  0
   -4.5333   -0.2001    0.0000 C   0  0  0  0  0  0  0  0  0  0  0  0
   -4.9024    0.5378    0.0000 C   0  0  0  0  0  0  0  0  0  0  0  0
   -5.7259    0.5871    0.0000 C   0  0  0  0  0  0  0  0  0  0  0  0
   -3.7098   -0.2494    0.0000 C   0  0  0  0  0  0  0  0  0  0  0  0
   -3.2553    0.4391    0.0000 C   0  0  0  0  0  0  0  0  0  0  0  0
   -3.6244    1.1770    0.0000 C   0  0  0  0  0  0  0  0  0  0  0  0
   -4.4479    1.2263    0.0000 C   0  0  0  0  0  0  0  0  0  0  0  0
   -2.4318    0.3898    0.0000 C   0  0  0  0  0  0  0  0  0  0  0  0
   -2.0627   -0.3480    0.0000 C   0  0  0  0  0  0  0  0  0  0  0  0
   -1.2392   -0.3974    0.0000 C   0  0  0  0  0  0  0  0  0  0  0  0
   -0.7847    0.2912    0.0000 N   0  0  0  0  0  0  0  0  0  0  0  0
   -1.1538    1.0290    0.0000 C   0  0  0  0  0  0  0  0  0  0  0  0
   -1.9773    1.0783    0.0000 C   0  0  0  0  0  0  0  0  0  0  0  0
   -0.4132    1.3925    0.0000 C   0  0  0  0  0  0  0  0  0  0  0  0
   -0.7248   -1.0424    0.0000 C   0  0  0  0  0  0  0  0  0  0  0  0
    0.2241    0.8686    0.0000 N   0  0  0  0  0  0  0  0  0  0  0  0
    0.9964    1.1585    0.0000 C   0  0  0  0  0  0  0  0  0  0  0  0
    1.1316    1.9723    0.0000 C   0  0  0  0  0  0  0  0  0  0  0  0
    0.4943    2.4963    0.0000 C   0  0  0  0  0  0  0  0  0  0  0  0
   -0.2781    2.2064    0.0000 C   0  0  0  0  0  0  0  0  0  0  0  0
   -0.8600   -1.8562    0.0000 C   0  0  0  0  0  0  0  0  0  0  0  0
   -0.2227   -2.3802    0.0000 C   0  0  0  0  0  0  0  0  0  0  0  0
    0.5497   -2.0903    0.0000 C   0  0  0  0  0  0  0  0  0  0  0  0
    0.6848   -1.2764    0.0000 C   0  0  0  0  0  0  0  0  0  0  0  0
    0.0476   -0.7525    0.0000 N   0  0  0  0  0  0  0  0  0  0  0  0
    0.5940   -0.1342    0.0000 Ru  0  0  0  0  0  0  0  0  0  0  0  0
    1.8819    1.0423    0.0000 C   0  0  0  0  0  0  0  0  0  0  0  0
    1.8346    0.2187    0.0000 N   0  0  0  0  0  0  0  0  0  0  0  0
    2.5243   -0.2341    0.0000 C   0  0  0  0  0  0  0  0  0  0  0  0
    3.2612    0.1368    0.0000 C   0  0  0  0  0  0  0  0  0  0  0  0
    3.3085    0.9605    0.0000 C   0  0  0  0  0  0  0  0  0  0  0  0
    2.6188    1.4132    0.0000 C   0  0  0  0  0  0  0  0  0  0  0  0
    2.3068   -1.0299    0.0000 C   0  0  0  0  0  0  0  0  0  0  0  0
    1.4827   -1.0690    0.0000 N   0  0  0  0  0  0  0  0  0  0  0  0
    1.1045   -1.8022    0.0000 C   0  0  0  0  0  0  0  0  0  0  0  0
    1.5504   -2.4963    0.0000 C   0  0  0  0  0  0  0  0  0  0  0  0
    2.3745   -2.4572    0.0000 C   0  0  0  0  0  0  0  0  0  0  0  0
    2.7527   -1.7240    0.0000 C   0  0  0  0  0  0  0  0  0  0  0  0
    1.0451    0.5566    0.0000 Cl  0  0  0  0  0  0  0  0  0  0  0  0
    5.4683    0.6953    0.0000 P   0  5  0  0  0  0  0  0  0  0  0  0
    6.1804    0.2842    0.0000 F   0  0  0  0  0  0  0  0  0  0  0  0
    6.1804    1.1064    0.0000 F   0  0  0  0  0  0  0  0  0  0  0  0
    5.4683    1.5175    0.0000 F   0  0  0  0  0  0  0  0  0  0  0  0
    4.7562    1.1064    0.0000 F   0  0  0  0  0  0  0  0  0  0  0  0
    4.7562    0.2842    0.0000 F   0  0  0  0  0  0  0  0  0  0  0  0
    5.4683   -0.1270    0.0000 F   0  0  0  0  0  0  0  0  0  0  0  0
  1  2  2  0      
  2  3  1  0      
  3  4  2  0      
  4  5  1  0      
  5  6  2  0      
  6  1  1  0      
  4  7  1  0      
  7  8  2  0      
  8  9  1  0      
  9 10  2  0      
 10  5  1  0      
  8 11  1  0      
 11 12  2  0      
 12 13  1  0      
 13 14  2  0      
 14 15  1  0      
 15 16  2  0      
 16 11  1  0      
 15 17  1  0      
 13 18  1  0      
 17 19  2  0      
 19 20  1  0      
 20 21  2  0      
 21 22  1  0      
 22 23  2  0      
 23 17  1  0      
 18 24  2  0      
 24 25  1  0      
 25 26  2  0      
 26 27  1  0      
 27 28  2  0      
 28 18  1  0      
 29 19  1  0      
 29 14  1  0      
 29 28  1  0      
 30 31  2  0      
 31 32  1  0      
 32 33  2  0      
 33 34  1  0      
 34 35  2  0      
 35 30  1  0      
 32 36  1  0      
 36 37  2  0      
 37 38  1  0      
 38 39  2  0      
 39 40  1  0      
 40 41  2  0      
 41 36  1  0      
 31 29  1  0      
 37 29  1  0      
 29 42  1  0      
 43 44  1  0      
 43 45  1  0      
 43 46  1  0      
 43 47  1  0      
 43 48  1  0      
 43 49  1  0      
M  CHG  1  43  -1
M  END
